# Supplementary material for: The reductive amination of aldehydes and ketones by catalytic use of dibutylchlorotin hydride complex
Source: Royal Society of Chemistry journal article supplement (doi:10.1039/b610614e), 2006-01-01

## Supporting Information

### Title: The Reductive Amination of Aldehydes and Ketones by Catalytic Use of Dibutylchlorotin Hydride Complex

Hirofumi Kato,<sup>a</sup> Ikuya Shibata,<sup>\*b</sup> Yuta Yasaka,<sup>b</sup> Shinji Tsunoi,<sup>b</sup> Makoto Yasuda<sup>a</sup> and Akio Baba<sup>\*a</sup>

<sup>a</sup> Department of Applied Chemistry, Center for Atomic and Molecular Technologies (CAMT), Graduate School of Engineering, Osaka University, 2-1 Yamadaoka, Suita, Osaka 565-0871, Japan.

<sup>b</sup> Research Center for Environmental Preservation, Osaka University, 2-4 Yamadaoka, Suita, Osaka 565-0871, Japan.

#### General:

IR spectra were recorded as thin film on a Horiba FT-720 spectrometer. All <sup>1</sup>H and <sup>13</sup>C-NMR spectra were recorded with a JEOL JNM-GSX-270 (270 and 67 MHz, respectively) or JEOL JMTC-400/54/SS (400 and 100 MHz, respectively) in deuteriochloroform (CDCl<sub>3</sub>) containing 0.03% (w/v) of tetramethylsilane. Mass spectra were recorded on a JEOL JMS-DS-303 spectrometer. Column chromatography was performed by using Fuji Davison silica gel FL-100DX. Preparative TLC was carried out on Wakogel B-5F silica gel.

#### A typical experimental procedure for Reductive Amination:

To the solution of Bu<sub>2</sub>SnH<sub>2</sub> (0.025 mmol) and Bu<sub>2</sub>SnCl<sub>2</sub> (0.025 mmol) in 2.5 mL of THF was added pyridine *N*-oxide (0.05 mmol). The mixture was stirred at room temperature for 5 min. To the solution were added carbonyl compound (2.5 mmol), amine (2.5 mmol) and hydrosilane (2.7 mmol), and the resulting mixture was stirred at room temperature for 2 h. After quenching with H<sub>2</sub>O (5 mL), the reaction mixture was extracted with ether (10 mL x 2). The combined organic layer was dried over MgSO<sub>4</sub> and concentrated. The residue was subjected to column chromatography eluting with hexane/EtOAc. Tin or silane residue and Pyridine *N*-Oxide were removed by this treatment. Further purification was performed by TLC eluting with hexane/Et<sub>2</sub>O. Product was determined by <sup>1</sup>H NMR.

#### *N*-Benzylaniline (3a)

Reference : T. Kawakami, T. Sugimoto, I. Shibata, A. Baba, H. Matsuda and N. Sonoda, *J. Org. Chem.*, 1995, **60**, 2677-2682.

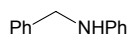

White solid; mp 35.5-37.8 °C (lit. 36-37.2 °C); IR (KBr) 3400, 1320cm<sup>-1</sup>; <sup>1</sup>H NMR (CDCl<sub>3</sub>, 400 MHz) δ 3.88 (br, 1H), 4.23 (s, 2H), 6.55-7.32 (m, 10H); <sup>13</sup>C NMR (CDCl<sub>3</sub>, 100.6 MHz) δ 48.1, 112.7, 117.4, 127.1, 127.4, 128.5, 129.2, 139.4, 148.1; HRMS calcd for C<sub>13</sub>H<sub>13</sub>N, 183.1049, found 183.1033.

lit.) K. A. Schellenberg, *J. Org. Chem.*, 1963, **28**, 3259-3261.

### ***N*-Benzyl-*p*-fluoroaniline (3b)**

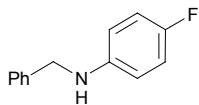

Yellow liquid; IR (neat) 3421 cm<sup>-1</sup>; <sup>1</sup>H NMR (CDCl<sub>3</sub>, 270 MHz) δ 3.93 (br, 1H), 4.28 (s, 2H), 6.55 (dd, *J*=4.39 and 8.78 Hz, 2H), 6.87 (t, *J*=8.78 Hz, 2H), 7.27-7.36 (m, 5H); <sup>13</sup>C NMR (CDCl<sub>3</sub>, 67.9 MHz) δ 48.4, 113.0 (d, *J*<sub>C-F</sub>=7 Hz), 115.1 (d, *J*<sub>C-F</sub>=22 Hz), 126.7, 126.9, 128.1, 138.6, 143.9, 155.2 (d, *J*<sub>C-F</sub>=234 Hz); MS (m/z) 201 (49), 124 (8), 91 (100); HRMS calcd for C<sub>13</sub>H<sub>12</sub>FN: 201.0954, found: 201.0965 (+1.1 mmu); Anal calcd for C<sub>13</sub>H<sub>12</sub>FN: C, 77.59; H, 6.01; N, 6.96; F, 9.44, found: C, 77.42; H, 6.09; N, 6.98; F, 9.49.

### ***N*-α-Phenethylphenylamine (3c)**

Reference : T. Kawakami, T. Sugimoto, I. Shibata, A. Baba, H. Matsuda and N. Sonoda, *J. Org. Chem.*, 1995, **60**, 2677-2682.

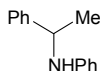

Colorless liquid; IR (neat) 3380, 1305 cm<sup>-1</sup>; <sup>1</sup>H NMR (CDCl<sub>3</sub>, 400 MHz) δ 1.48 (d, *J*=6.84 Hz, 3H), 3.99 (br, 1H), 4.46 (q, *J*=6.84 Hz, 1H), 6.47-7.36 (m, 10H); <sup>13</sup>C NMR (CDCl<sub>3</sub>, 100.6 MHz) δ 25.0, 53.4, 113.2, 117.2, 125.8, 126.8, 128.6, 129.0, 145.2, 147.2; HRMS calcd for C<sub>14</sub>H<sub>15</sub>N 197.1206, found 197.1199 (-0.7 mmu).

### ***N*-2-(4-Phenylbutyl)aniline (3d)**

Reference : T. Suwa, E. Sugiyama, I. Shibata and A. Baba, *Synthesis*, 2000, 789–800.

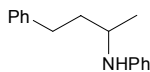

Colorless liquid; IR (neat) 3402 cm<sup>-1</sup>; <sup>1</sup>H NMR (CDCl<sub>3</sub>, 270 MHz) δ 1.21 (d, *J*=6.4 Hz, 3H), 1.69-1.94 (m, 2H), 2.72 (t, *J*=7.8 Hz, 2H), 3.42 (br, 1H), 3.48 (tq, *J*=6.4 and 6.4 Hz, 1H), 6.50 (d, *J*=7.8 Hz, 2H), 6.65 (t, *J*=7.8 Hz, 1H), 7.10-7.29 (m, 7H); <sup>13</sup>C NMR (CDCl<sub>3</sub>, 67.9 MHz) δ 20.8, 32.5, 38.8, 47.9, 113.2, 116.9, 125.8, 128.4, 128.4, 129.3, 142.0, 147.6; HRMS calcd for C<sub>16</sub>H<sub>19</sub>N 225.1519, found 225.1515 (-0.4 mmu).

### ***N*-2-Pentylaniline (3e)**

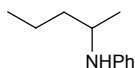

Yellow liquid; IR (neat) 3405  $\text{cm}^{-1}$ ;  $^1\text{H}$  NMR ( $\text{CDCl}_3$ , 270 MHz)  $\delta$  0.92 (t,  $J=7.08$  Hz, 3H), 1.16 (d,  $J=6.10$  Hz, 3H), 1.33-1.61(m, 4H), 3.42-3.49 (m, 2H), 6.56 (d,  $J=8.05$  Hz, 2H), 6.65 (t,  $J=7.32$  Hz, 1H), 7.15 (dd,  $J=7.32$  and 8.05 Hz, 2H);  $^{13}\text{C}$  NMR ( $\text{CDCl}_3$ , 67.9 MHz)  $\delta$  14.1, 19.3, 20.8, 39.4, 48.1, 112.9, 116.6, 129.1, 147.6; MS (m/z) 163 (13), 120 (100), 77 (7); HRMS calcd for  $\text{C}_{11}\text{H}_{17}\text{N}$ : 163.1361, found: 163.1356 (-0.5 mmu); Anal calcd for  $\text{C}_{11}\text{H}_{17}\text{N}$ : C, 80.93; H, 10.50; N, 8.58, found: C, 80.67; H, 10.47; N, 8.43.

### ***N*-(2-Ethylbutyl)aniline (3f)**

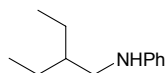

Colorless liquid; IR (neat) 3421 $\text{cm}^{-1}$ ;  $^1\text{H}$  NMR ( $\text{CDCl}_3$ , 270 MHz)  $\delta$  0.91 (t,  $J=7.32$  Hz, 6H), 1.34-1.55 (m, 5H), 3.01 (d,  $J=5.86$  Hz, 2H), 3.58 (br, 1H), 6.59 (d,  $J=8.54$  Hz, 2H), 6.66 (t,  $J=7.32$  Hz, 1H), 7.16 (dd,  $J=7.32$  and 8.54 Hz, 2H);  $^{13}\text{C}$  NMR ( $\text{CDCl}_3$ , 67.9 MHz)  $\delta$  10.9, 24.0, 40.5, 46.5, 112.5, 116.8, 129.1, 148.6; MS (m/z) 177 (2), 106 (100), 77 (7); HRMS calcd for  $\text{C}_{12}\text{H}_{19}\text{N}$ : 177.1517, found: 177.1522 (+0.5 mmu); Anal calcd for  $\text{C}_{12}\text{H}_{19}\text{N}$ : C, 81.30; H, 10.80; N, 7.92, found: C, 81.03; H, 10.68; N, 7.82.

### ***N*-(2-Ethylbutyl)-*p*-fluoroaniline (3g)**

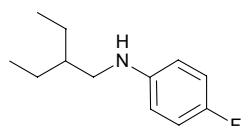

Yellow liquid; IR (neat) 3428 $\text{cm}^{-1}$ ;  $^1\text{H}$  NMR ( $\text{CDCl}_3$ , 270 MHz)  $\delta$  0.90 (t,  $J=7.08$  Hz, 6H), 1.34-1.53 (m, 5H), 2.96 (d,  $J=5.86$  Hz, 2H), 3.47 (br, 1H), 6.52 (dd,  $J=4.39$  and 8.78 Hz, 2H), 6.87 (t,  $J=8.78$  Hz, 2H);  $^{13}\text{C}$  NMR ( $\text{CDCl}_3$ , 67.9 MHz)  $\delta$  10.9, 23.9, 40.5, 47.3, 113.2 (d,  $J_{\text{C-F}}=7$  Hz), 115.5 (d,  $J_{\text{C-F}}=22$  Hz), 145.0, 155.4 (d,  $J_{\text{C-F}}=233$  Hz); MS (m/z) 195 (2), 124 (100), 95 (3); HRMS calcd for  $\text{C}_{12}\text{H}_{18}\text{FN}$ : 195.2765, found: 195.2765 (+0.0 mmu); Anal calcd for  $\text{C}_{12}\text{H}_{18}\text{FN}$ : C, 73.81; H, 9.29; N, 7.17; F, 9.73, found: C, 74.08; H, 9.28; N, 7.23; F, 9.78.

### ***N*-(3-Methylbutyl)aniline (3h)**

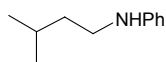

Colorless liquid; IR (neat) 3409  $\text{cm}^{-1}$ ;  $^1\text{H}$  NMR ( $\text{CDCl}_3$ , 270 MHz)  $\delta$  0.94 (d,  $J=6.59$  Hz, 6H), 1.50 (dt,  $J=6.83$  and 7.32 Hz, 2H), 1.64-1.79 (m, 1H), 3.11 (t,  $J=7.32$  Hz, 2H), 3.53 (br, 1H), 6.59 (d,  $J=8.30$  Hz, 2H), 6.68 (t,  $J=7.32$  Hz, 1H), 7.16 (dd,  $J=7.32$  and 8.30 Hz, 2H);  $^{13}\text{C}$  NMR ( $\text{CDCl}_3$ , 67.9 MHz)  $\delta$  22.6, 26.0, 38.5, 42.1, 112.6, 117.0, 129.1, 148.4; MS ( $m/z$ ) 163 (2), 106 (100), 77 (9); HRMS calcd for  $\text{C}_{11}\text{H}_{17}\text{N}$ : 163.1361, found: 163.1346 (-1.5 mmu); Anal calcd for  $\text{C}_{11}\text{H}_{17}\text{N}$ : C, 80.93; H, 10.50; N, 8.58, found: C, 80.80; H, 10.42; N, 8.40.

### ***N*-(3-Methylbutyl)-*p*-fluoroaniline (3i)**

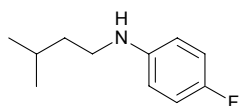

Yellow liquid; IR (neat) 3417  $\text{cm}^{-1}$ ;  $^1\text{H}$  NMR ( $\text{CDCl}_3$ , 270 MHz)  $\delta$  0.94 (d,  $J=6.83$  Hz, 6H), 1.48 (dt,  $J=6.83$  and 7.32 Hz, 2H), 1.63-1.75 (m, 1H), 3.05 (t,  $J=7.32$  Hz, 2H), 3.45 (br, 1H), 6.49-6.55 (m, 2H), 6.84-6.90 (m, 2H);  $^{13}\text{C}$  NMR ( $\text{CDCl}_3$ , 67.9 MHz)  $\delta$  22.6, 26.0, 38.5, 42.8, 113.3 (d,  $J_{\text{C-F}}=7$  Hz), 115.5 (d,  $J_{\text{C-F}}=22$  Hz), 144.8, 155.5 (d,  $J_{\text{C-F}}=234$  Hz); MS ( $m/z$ ) 181 (19), 124 (100), 95 (4); HRMS calcd for  $\text{C}_{11}\text{H}_{16}\text{FN}$ : 181.1267, found: 181.1268 (+0.1 mmu); Anal calcd for  $\text{C}_{11}\text{H}_{16}\text{FN}$ : C, 72.89; H, 8.90; N, 7.73; F, 10.48, found: C, 72.73; H, 8.75; N, 7.71; F, 10.50.

### ***N*-1-Pentylaniline (3j)**

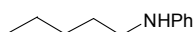

Yellow liquid; IR (neat) 3409  $\text{cm}^{-1}$ ;  $^1\text{H}$  NMR ( $\text{CDCl}_3$ , 270 MHz)  $\delta$  0.91 (t,  $J=6.83$  Hz, 3H), 1.35-1.38 (m, 4H), 1.59-1.64 (m, 2H), 3.09 (t,  $J=7.08$  Hz, 2H), 3.62 (br, 1H), 6.60 (d,  $J=7.56$  Hz, 2H), 6.68 (t,  $J=7.32$  Hz, 1H), 7.14-7.19 (m, 2H);  $^{13}\text{C}$  NMR ( $\text{CDCl}_3$ , 67.9 MHz)  $\delta$  14.0, 22.5, 29.2, 29.3, 43.9, 112.6, 116.9, 129.1, 148.4; MS ( $m/z$ ) 163 (18), 106 (100), 77 (8); HRMS calcd for  $\text{C}_{11}\text{H}_{17}\text{N}$ : 163.1361, found: 163.1353 (-0.8 mmu).

### ***N*-Propyl-4-phenyl-2-butylamine (3k)**

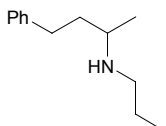

Yellow liquid; IR (neat) 3309  $\text{cm}^{-1}$ ;  $^1\text{H}$  NMR ( $\text{CDCl}_3$ , 400 MHz)  $\delta$  0.91 (t,  $J=7.24$  Hz, 3H), 1.09 (d,  $J=6.27$  Hz, 3H), 1.47 (tq,  $J=7.24$  and 7.36 Hz, 2H), 1.61 (ddt,  $J=6.52$  and 13.76 and 9.90 Hz, 1H), 1.78 (ddt,  $J=6.27$  and 13.76 and 9.90 Hz, 1H), 2.47-2.70 (m, 5H), 7.15-7.29 (m, 5H);  $^{13}\text{C}$  NMR ( $\text{CDCl}_3$ , 100.6 MHz)  $\delta$  11.8, 20.3, 23.5, 32.3, 38.7, 49.1, 52.6, 125.6, 128.2, 128.2, 142.4; MS ( $m/z$ ) 191 (3), 91 (25), 86 (100); HRMS calcd for  $\text{C}_{13}\text{H}_{21}\text{N}$ : 191.1674, found: 191.1661 (-1.3 mmu).

***N*-Benzyl-2-(4-phenyl)-butylamine (3I)**

Reference : T. Suwa, E. Sugiyama, I. Shibata and A. Baba, *Synlett*, 2000, 556-558.

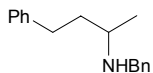

Colorless liquid; IR (neat) 3325 cm<sup>-1</sup>; <sup>1</sup>H NMR (CDCl<sub>3</sub>, 270 MHz) δ 1.13 (d, *J*=6.4 Hz, 3H), 1.36 (br, 1H), 1.65 (dt, *J*=6.8 and 6.8 Hz, 1H), 1.80 (dt, *J*=6.8 and 6.8 Hz, 1H), 2.64 (t, *J*=6.8 Hz, 2H), 2.71 (tq, *J*=6.4 and 6.8 Hz, 1H), 3.71 (d, *J*=13.2 Hz, 1H), 3.81 (d, *J*=13.2 Hz, 1H), 7.14-7.30 (m, 10H); <sup>13</sup>C NMR (CDCl<sub>3</sub>, 67.9 MHz) δ 20.3, 32.2, 38.7, 51.2, 52.0, 125.6, 126.8, 128.1, 128.3, 128.3, 140.8, 142.4; HRMS calcd for C<sub>17</sub>H<sub>21</sub>N 239.1675, found 239.1676 (+0.1 mmu); Anal calcd for C<sub>17</sub>H<sub>21</sub>N: C, 85.30; H, 8.84; N, 5.85, found: C, 84.98; H, 8.88; N, 5.99.

***N*-Benzyl-*p*-fluoroaniline (3b)**

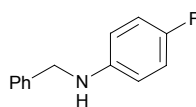

**<sup>1</sup>H NMR**

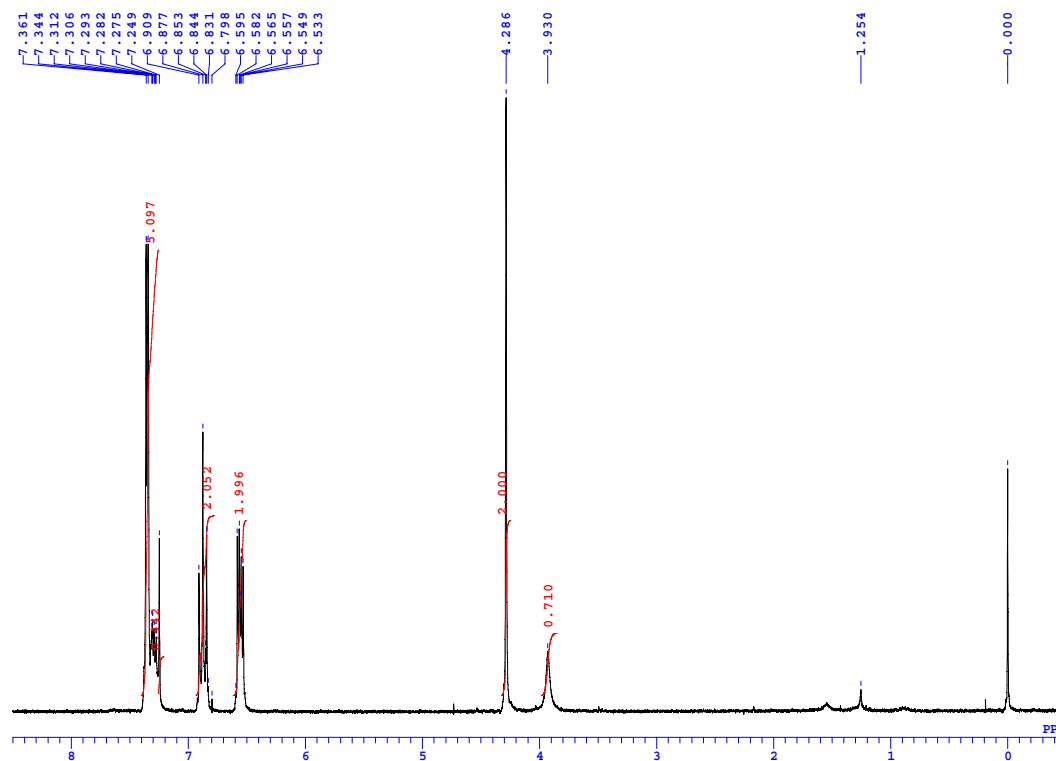

**<sup>13</sup>C NMR**

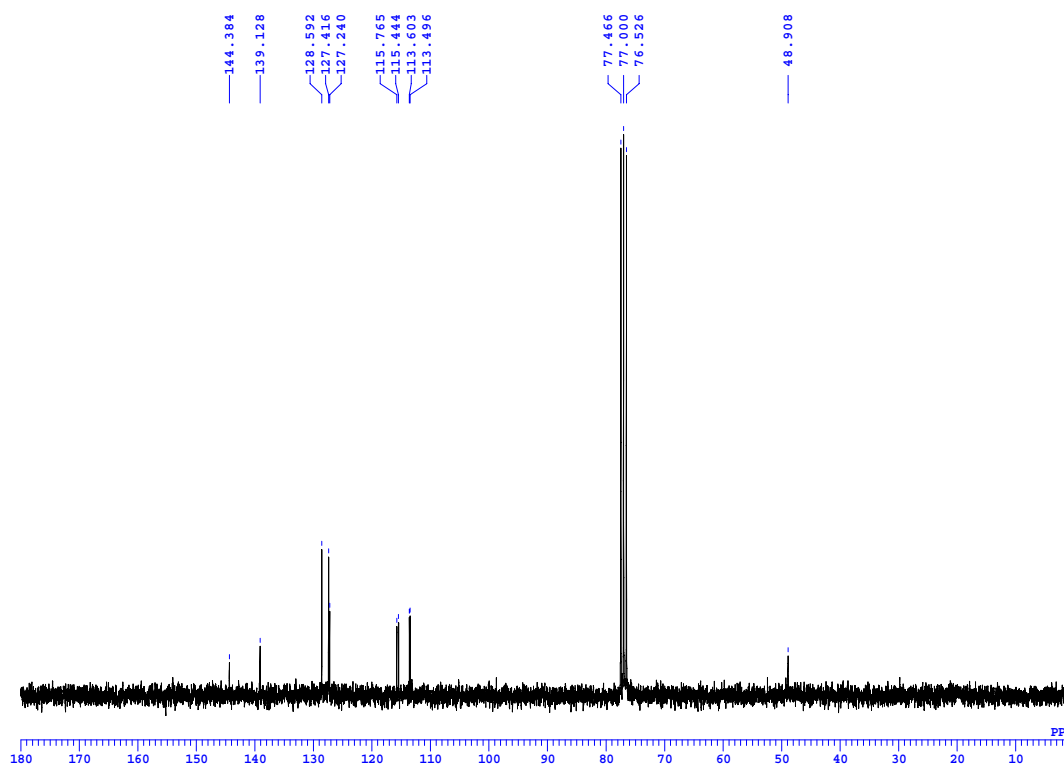

***N*-2-Pentylaniline (3e)**

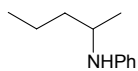

**<sup>1</sup>H NMR**

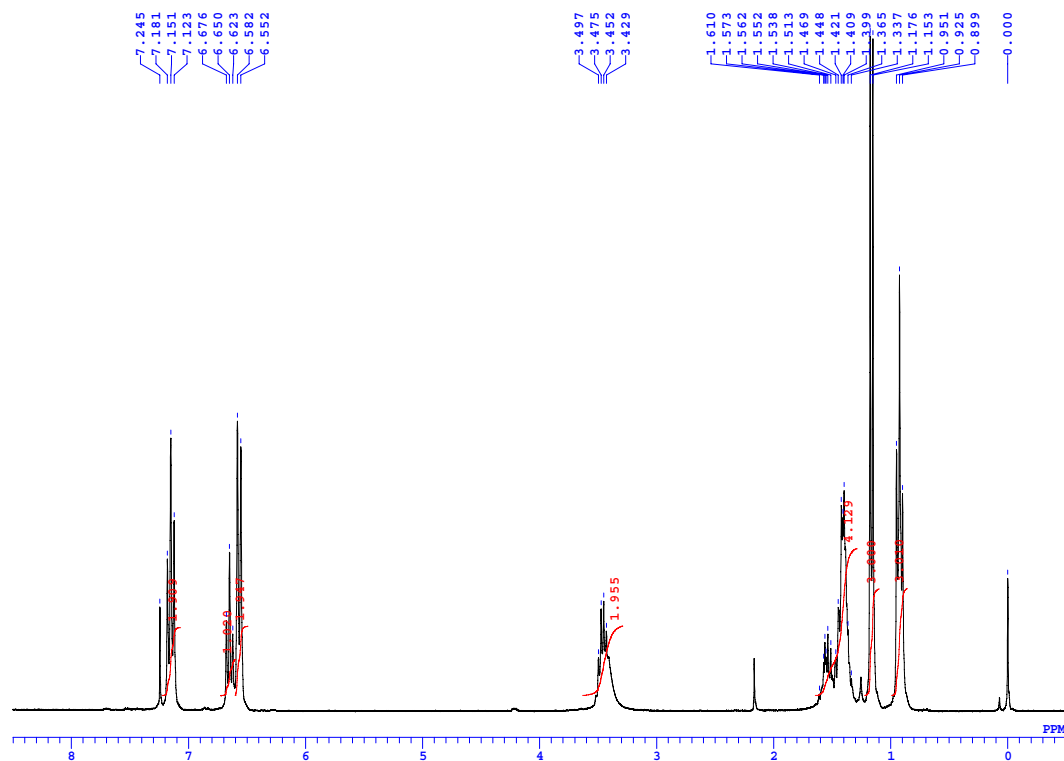

**<sup>13</sup>C NMR**

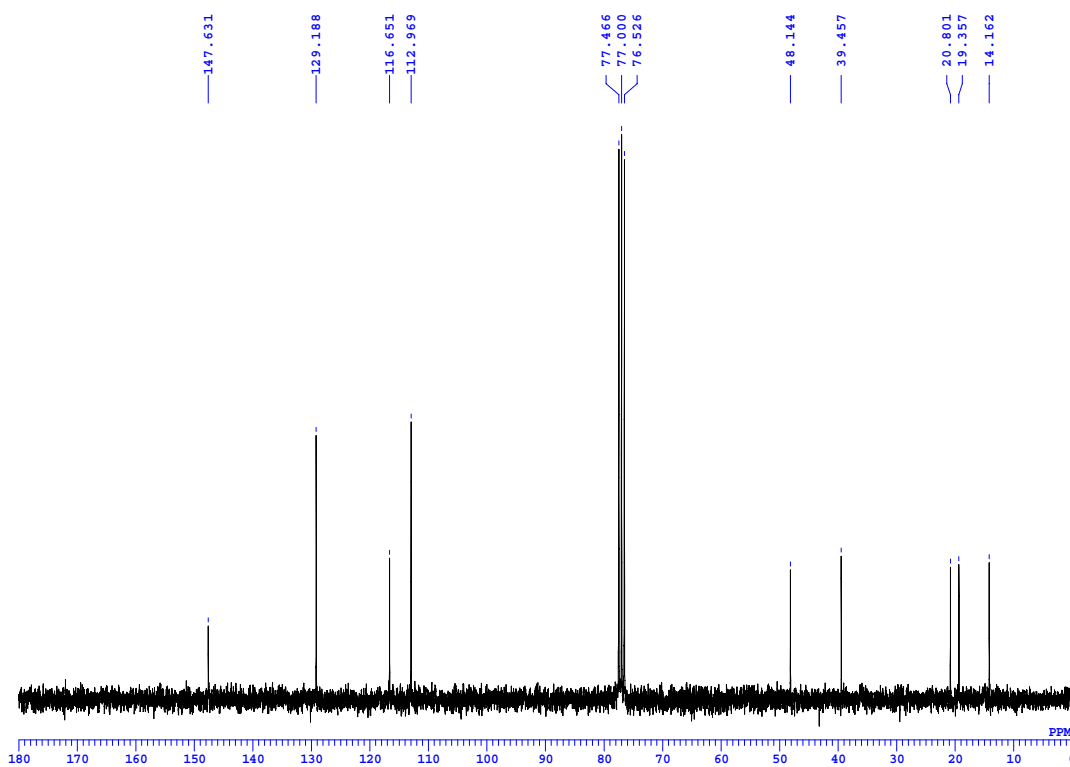

***N*-(2-Ethylbutyl)aniline (3f)**

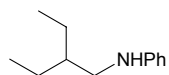

**<sup>1</sup>H NMR**

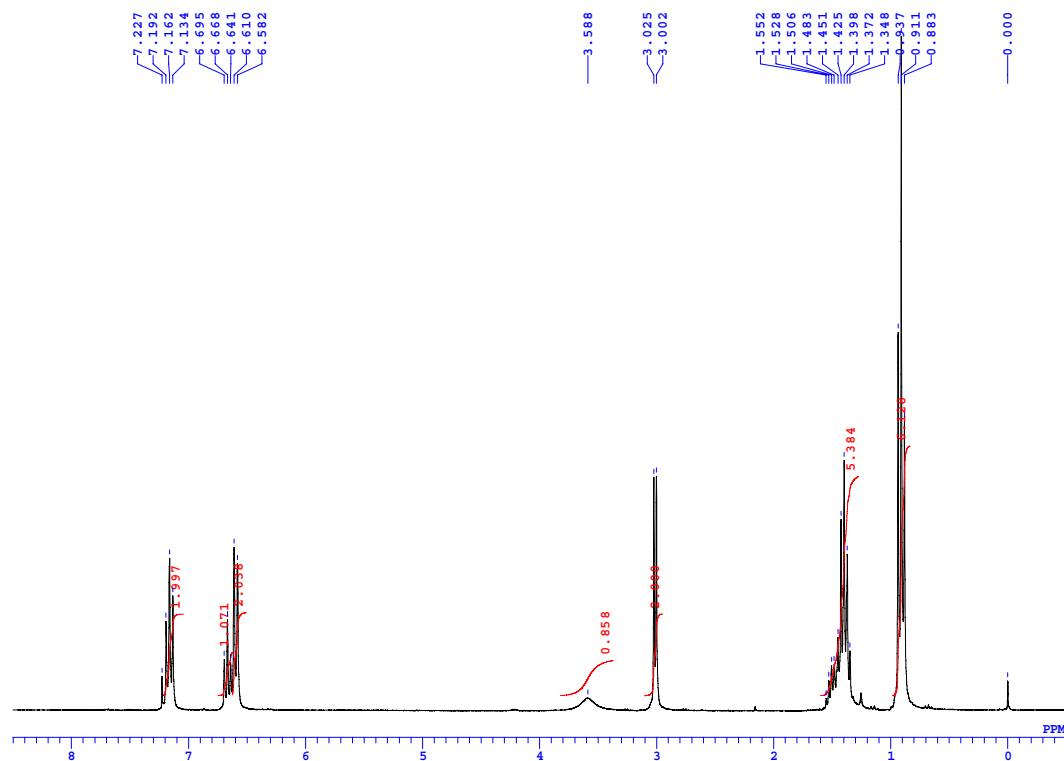

**<sup>13</sup>C NMR**

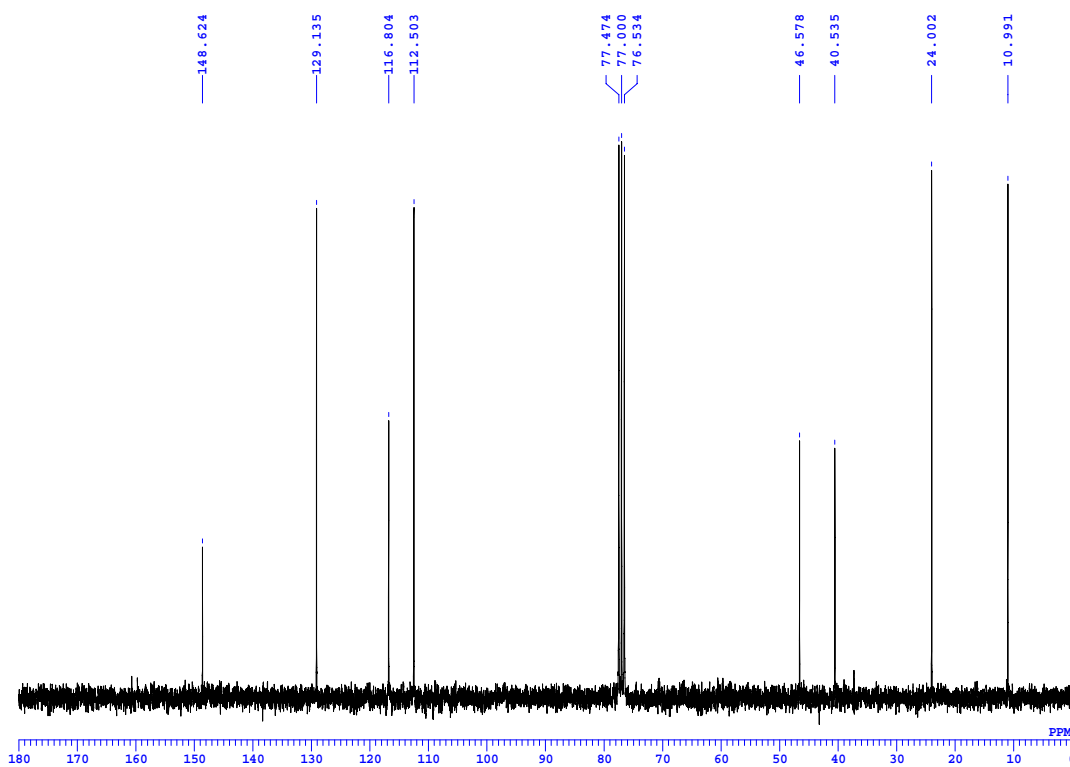



***N*-(2-Ethylbutyl)-*p*-fluoroaniline (3g)**

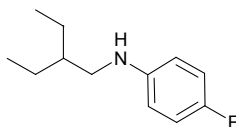

**<sup>1</sup>H NMR**

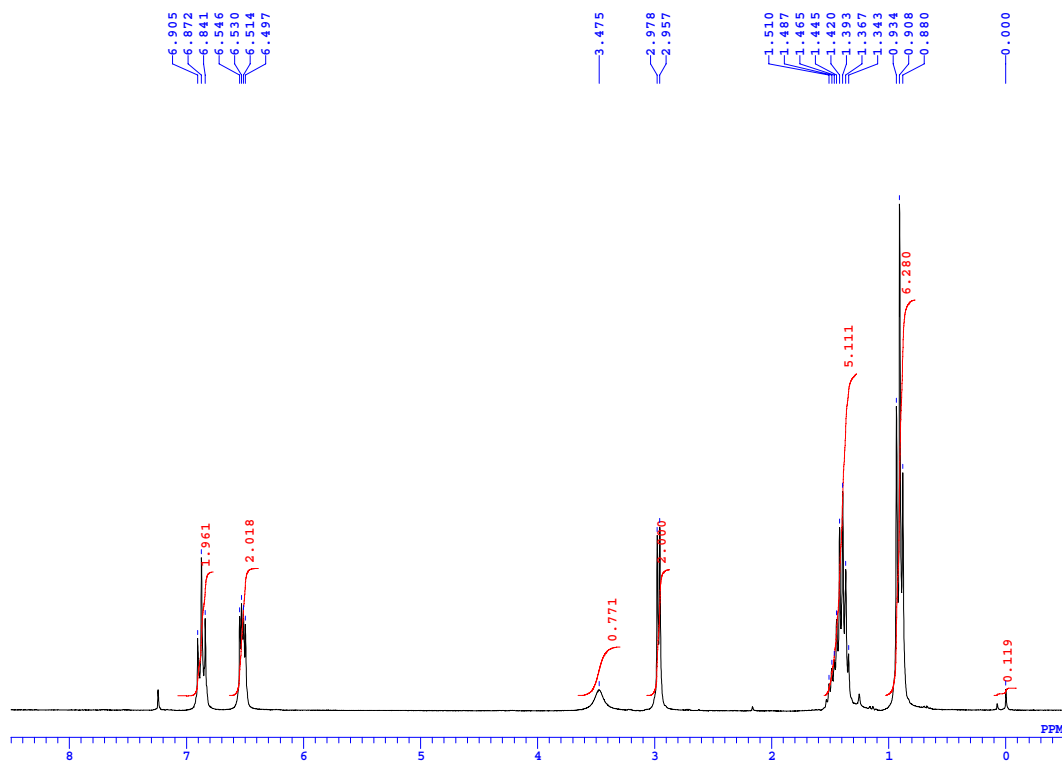

**<sup>13</sup>C NMR**

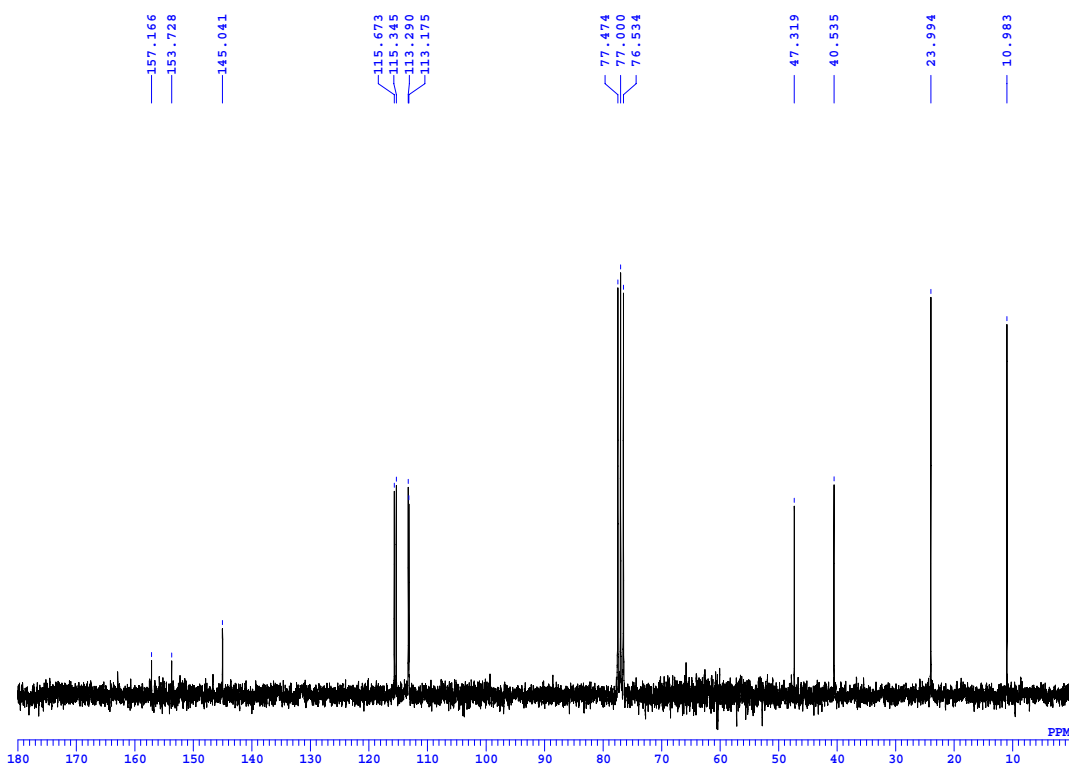

***N*-(3-Methylbutyl)aniline (3h)**

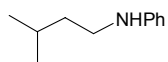

**<sup>1</sup>H NMR**

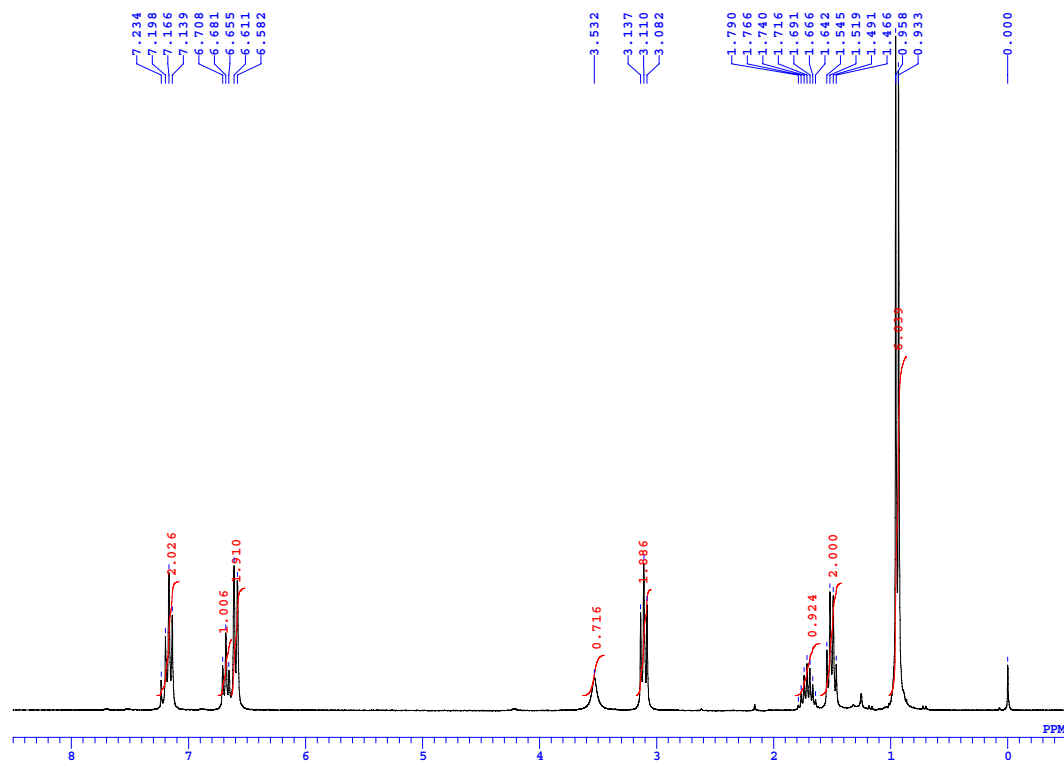

**<sup>13</sup>C NMR**

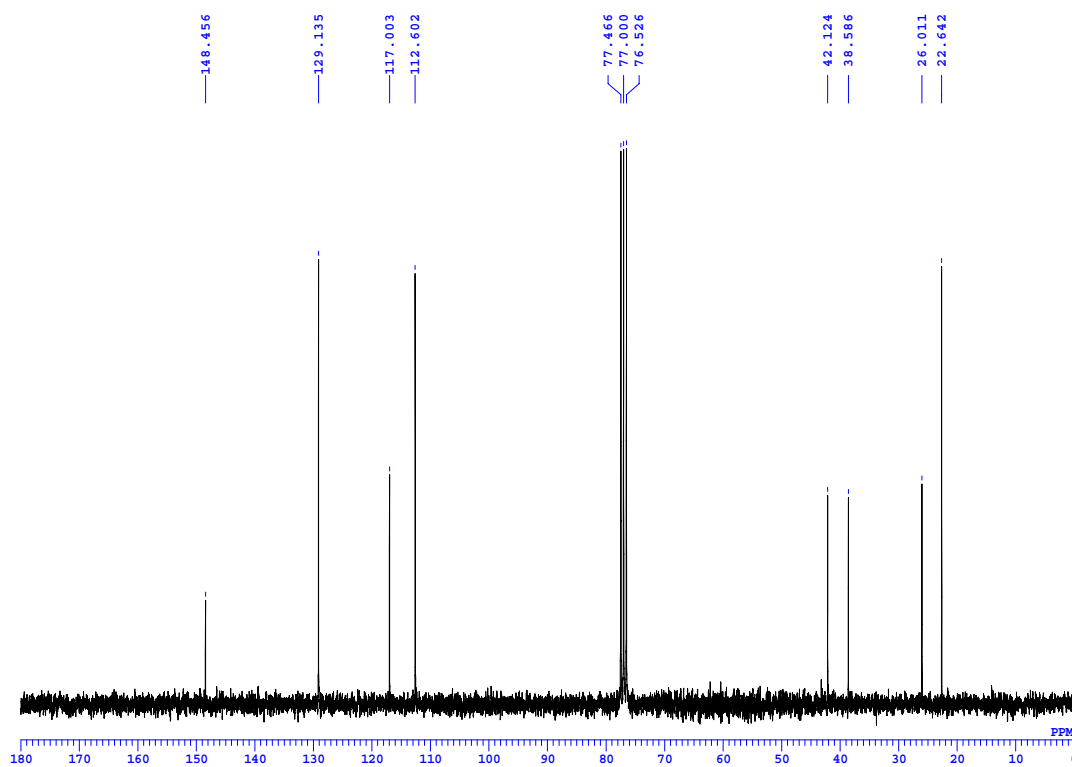

***N*-(3-Methylbutyl)-*p*-fluoroaniline (3i)**

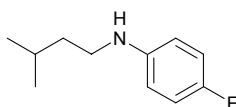

**<sup>1</sup>H NMR**

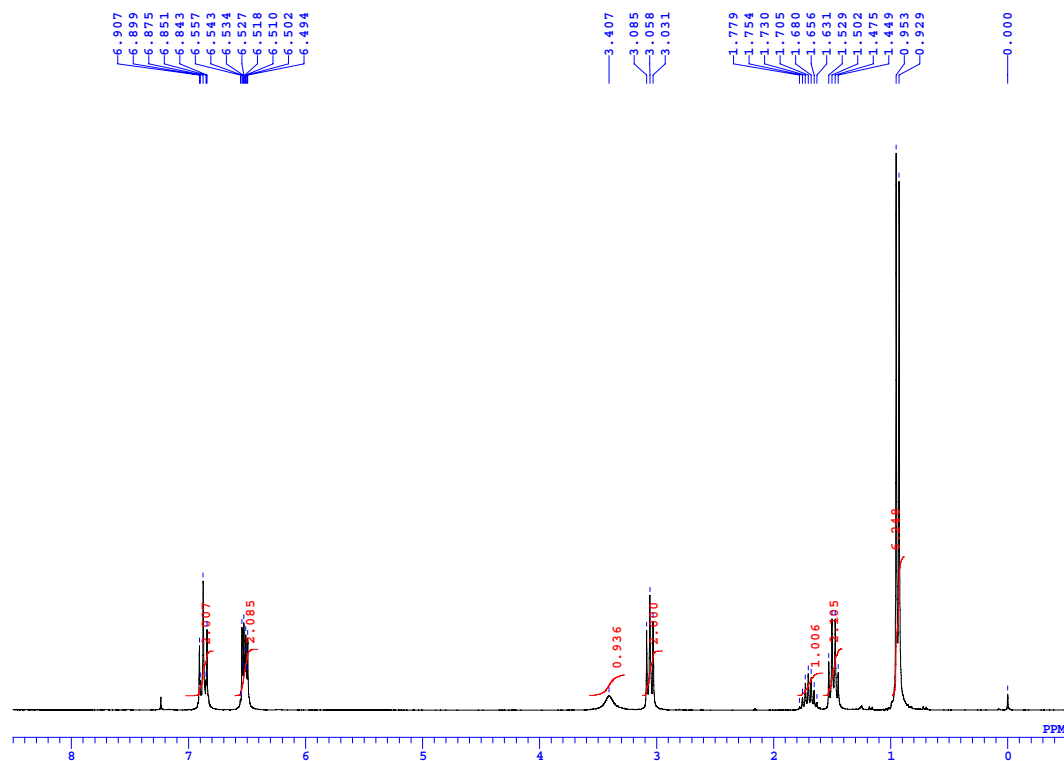

**<sup>13</sup>C NMR**

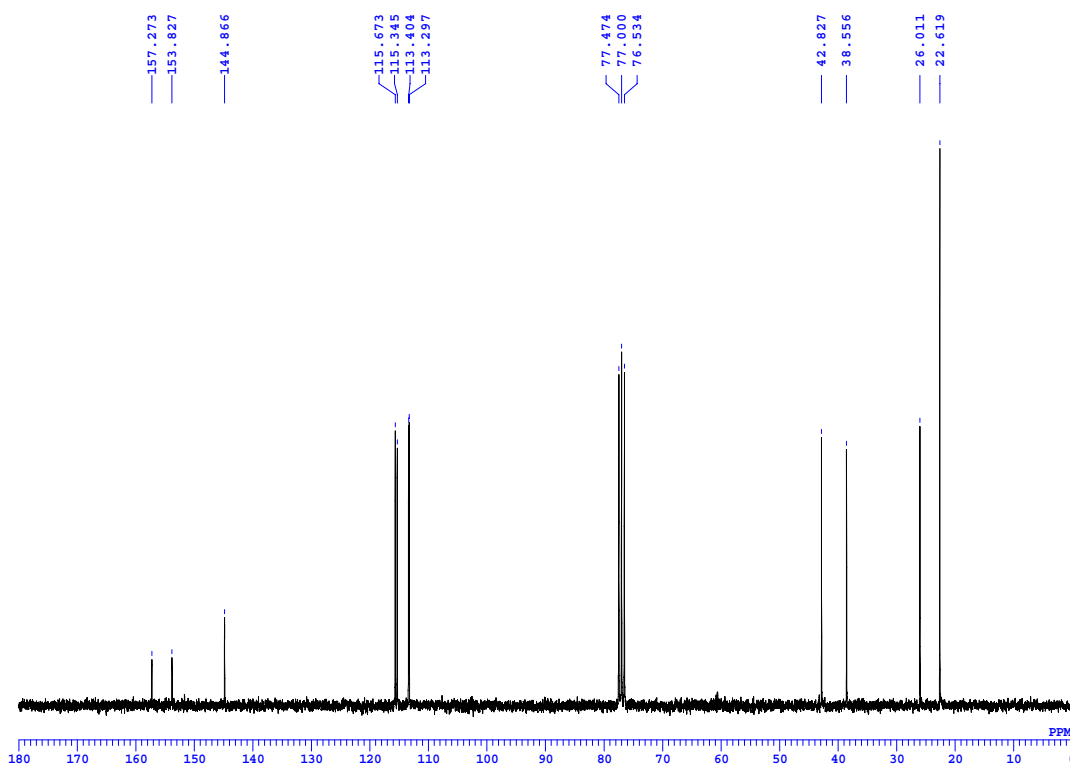

### *N*-1-Pentylaniline (3j)

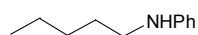

### <sup>1</sup>H NMR

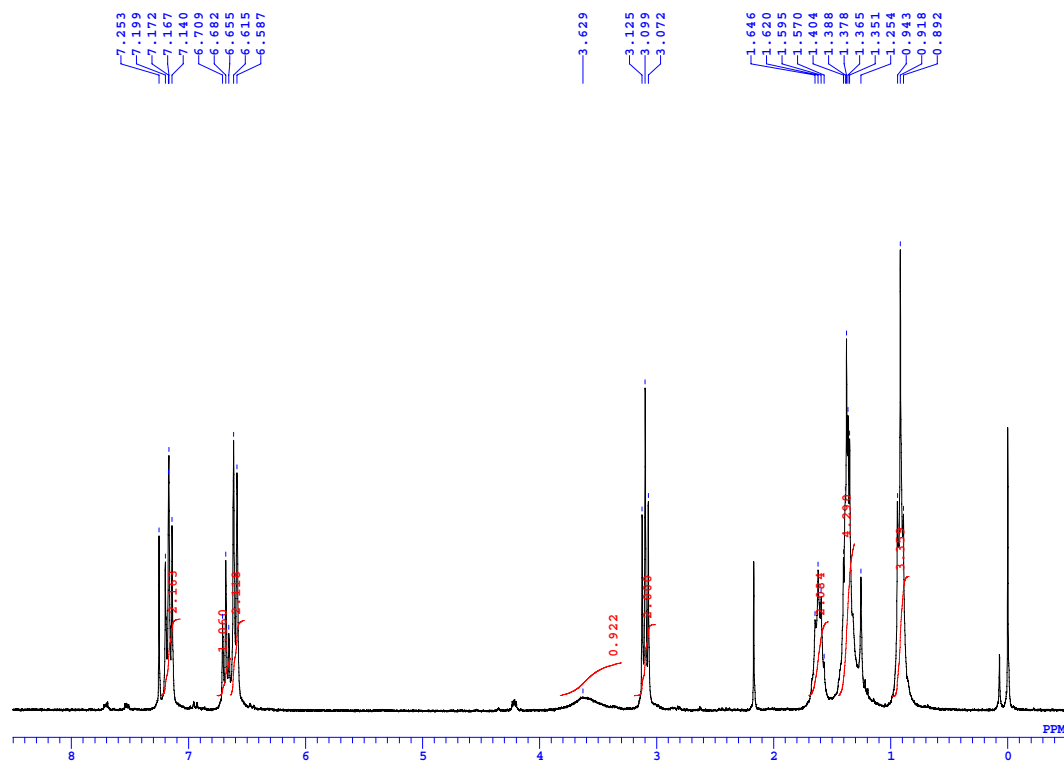

### <sup>13</sup>C NMR

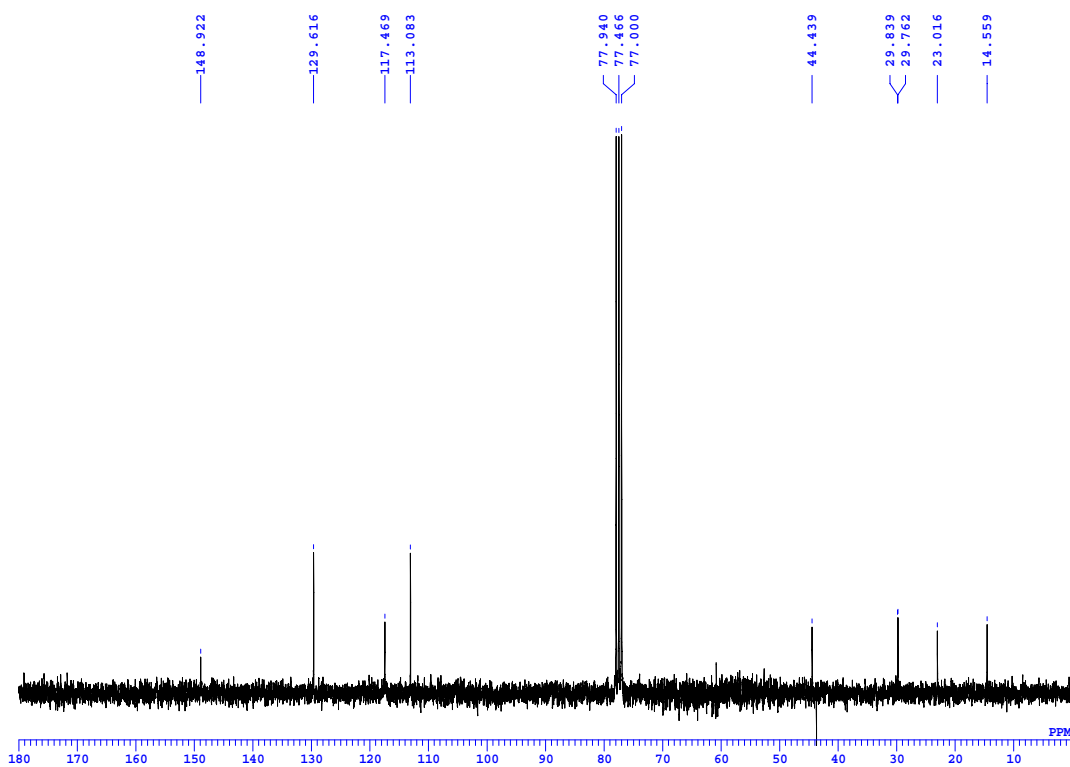

***N*-Propyl-4-phenyl-2-butylamine (3k)**

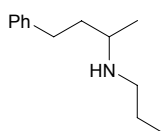

**<sup>1</sup>H NMR**

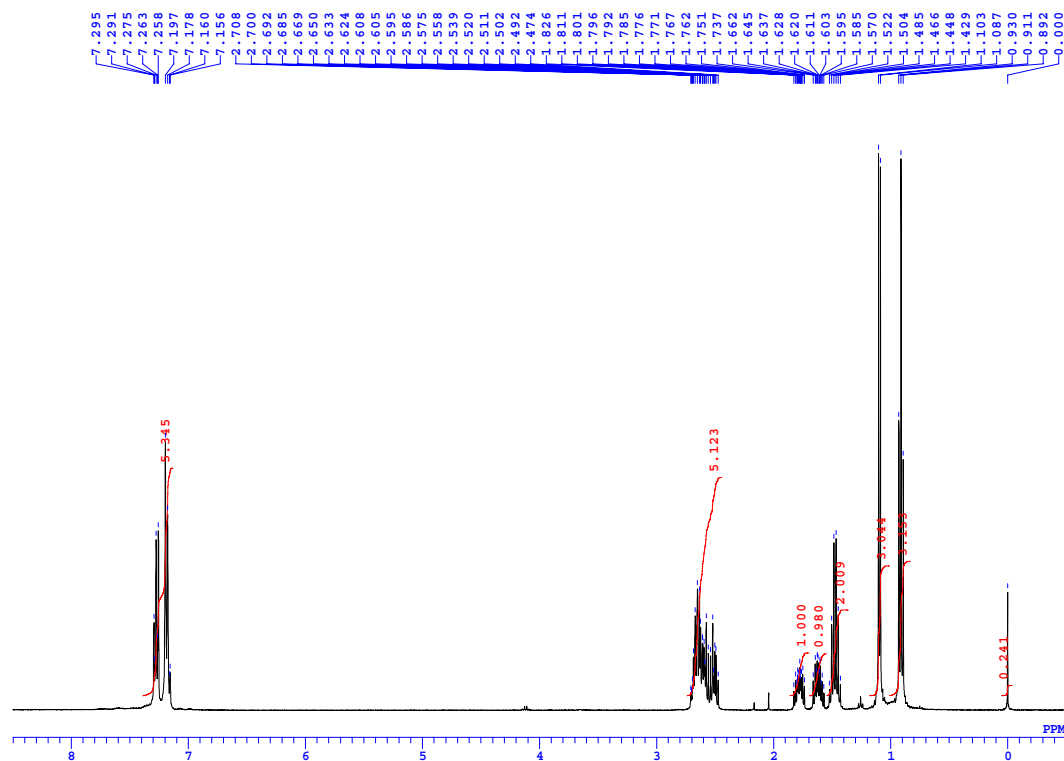

**<sup>13</sup>C NMR**

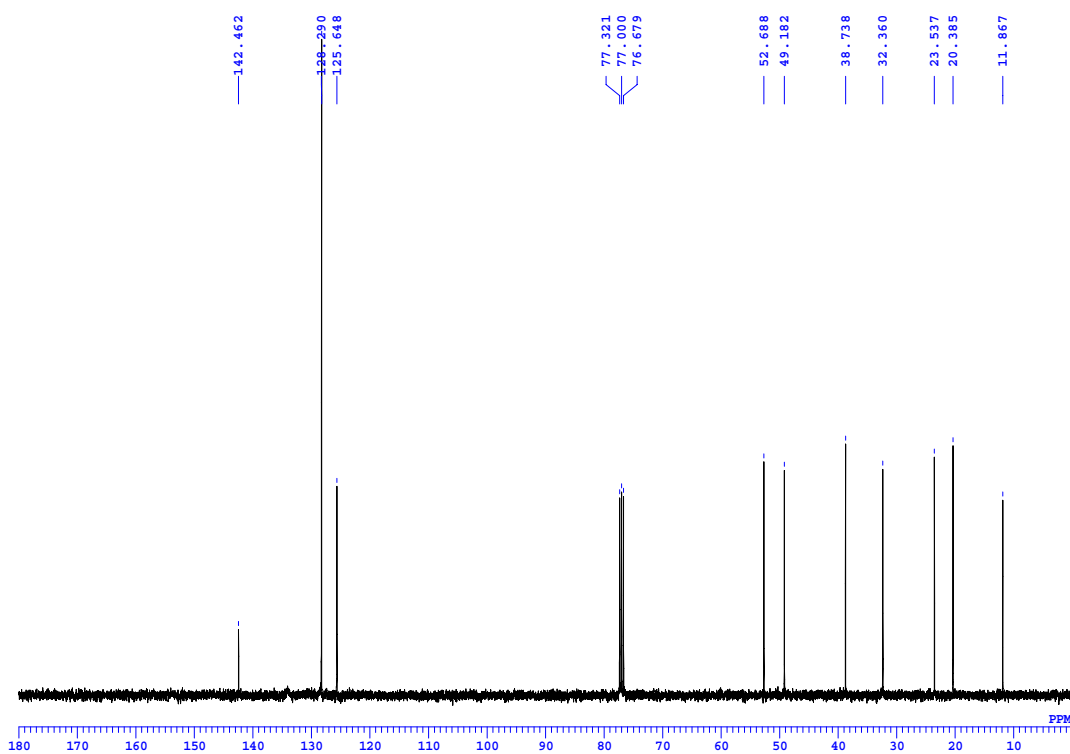

Supplement: b610614e.pdf [file b610614e.pdf]
